# Supplementary material for: High-quality, customizable heuristics for RNA 3D structure alignment
Source: PubMed Central journal article supplement (PMC10199316; doi:10.1093/bioinformatics/btad315), 2023-05-11
Supplement: btad315_supplementary_data.pdf [file btad315_supplementary_data.pdf]

## Supplementary Material

### High-quality, customizable heuristics for RNA 3D structure alignment

Michał Zurkowski<sup>1</sup>, Maciej Antczak<sup>1,\*</sup>, Marta Szachniuk<sup>1,2,\*</sup>

<sup>1</sup> Institute of Computing Science, Poznan University of Technology, 60-965 Poznan, Poland

<sup>2</sup> Institute of Bioorganic Chemistry, Polish Academy of Sciences, 61-704 Poznan, Poland

\*To whom correspondence should be addressed:

[mantczak@cs.put.poznan.pl](mailto:mantczak@cs.put.poznan.pl), [mszachniuk@cs.put.poznan.pl](mailto:mszachniuk@cs.put.poznan.pl)

**Figure S1.** Flowchart of GEOMETRIC Search algorithm (GEOS): (A) identification of a kernel, (B) building the kernel-based alignment.

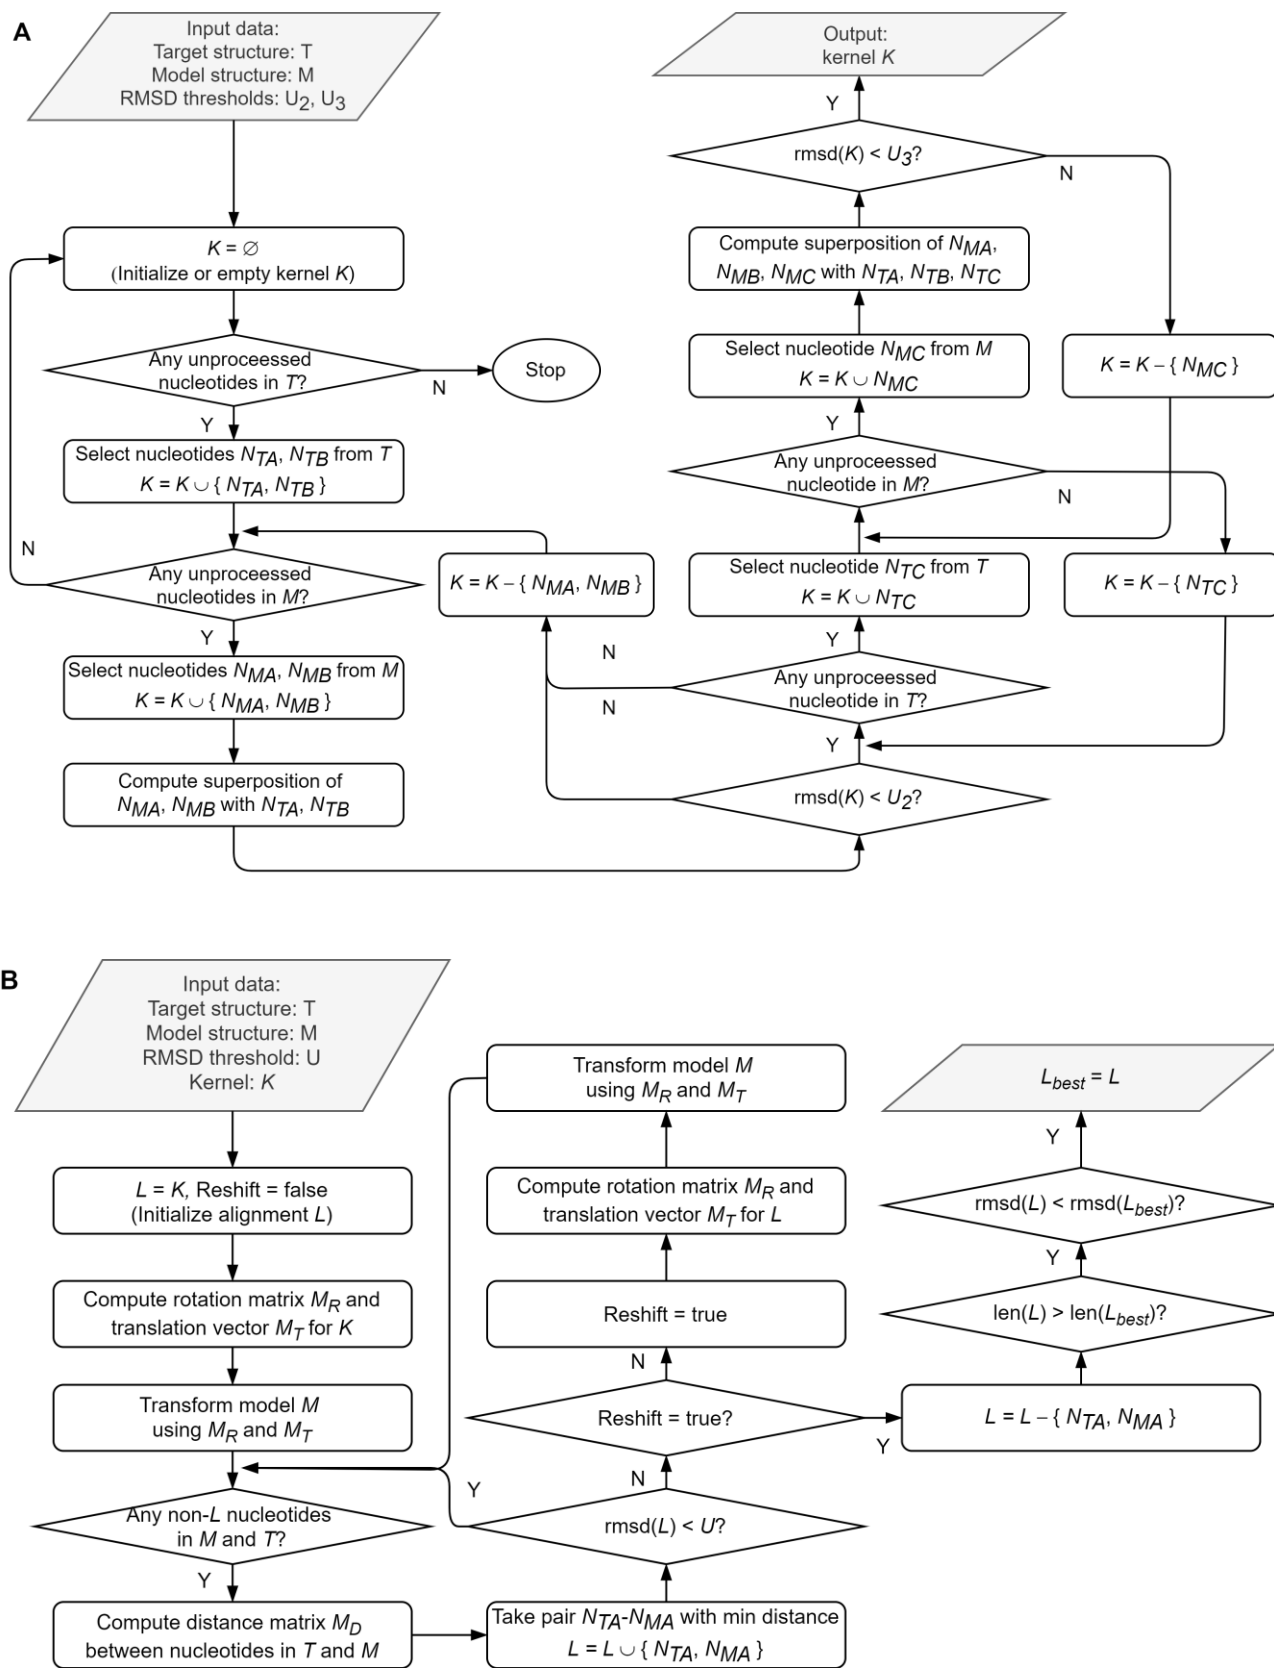

**Figure S2.** Schematic representation of mutations in the GENS algorithm.

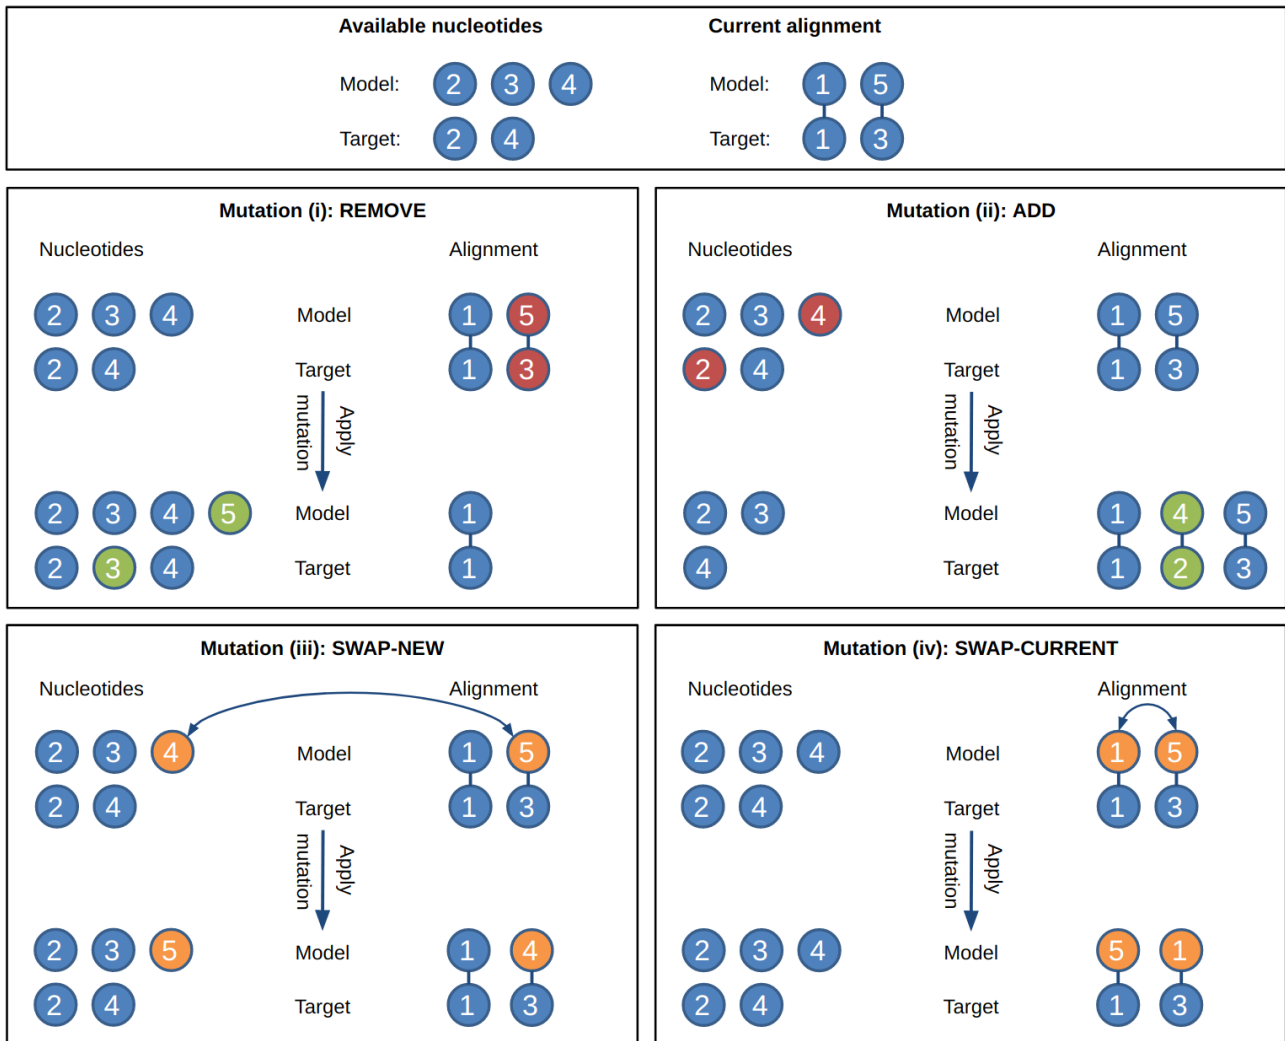

**Figure S3.** Average coverage of the target structure by aligned fragments of models submitted in a given puzzle. Alignments found by (A) R3D Align, (B) STAR3D, (C) SuperRNAAlign, (D) RMAAlign, and (E) RNA-align.

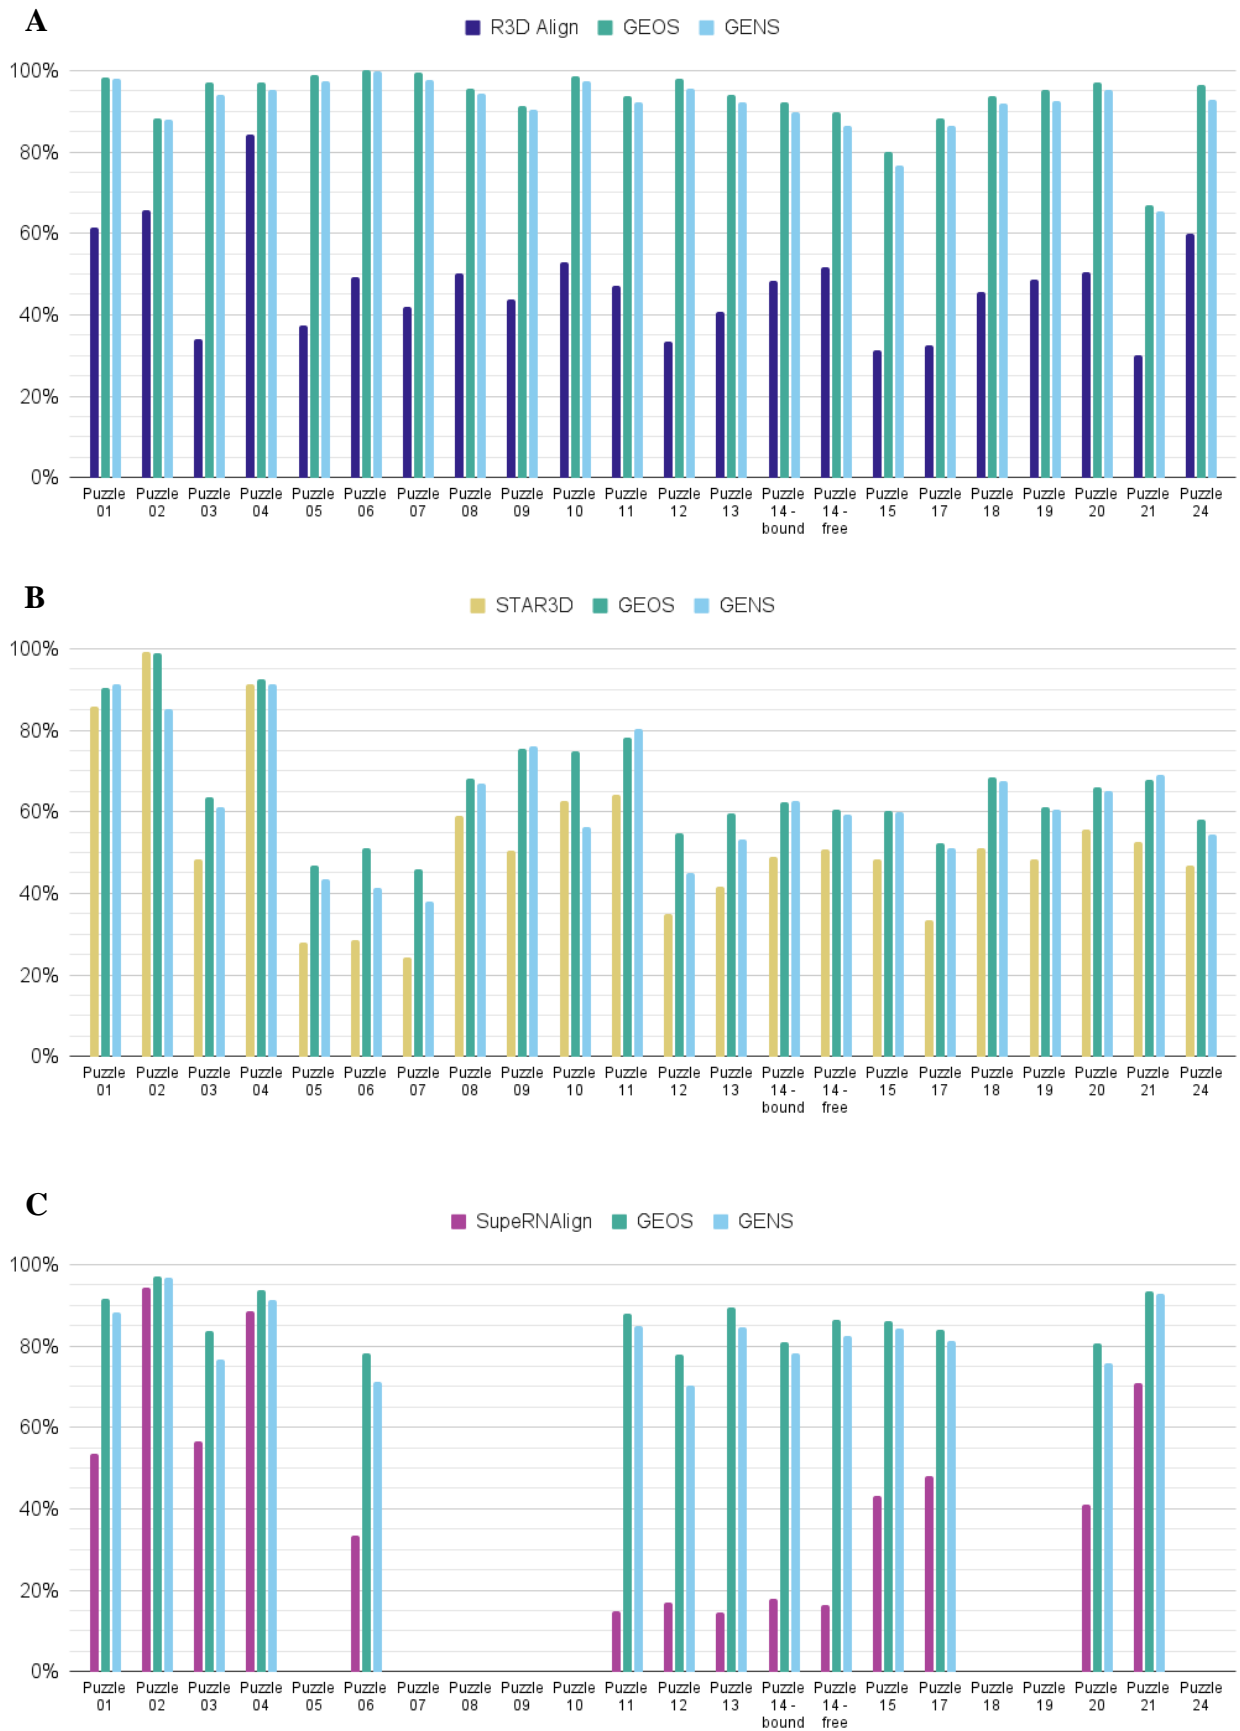

**D**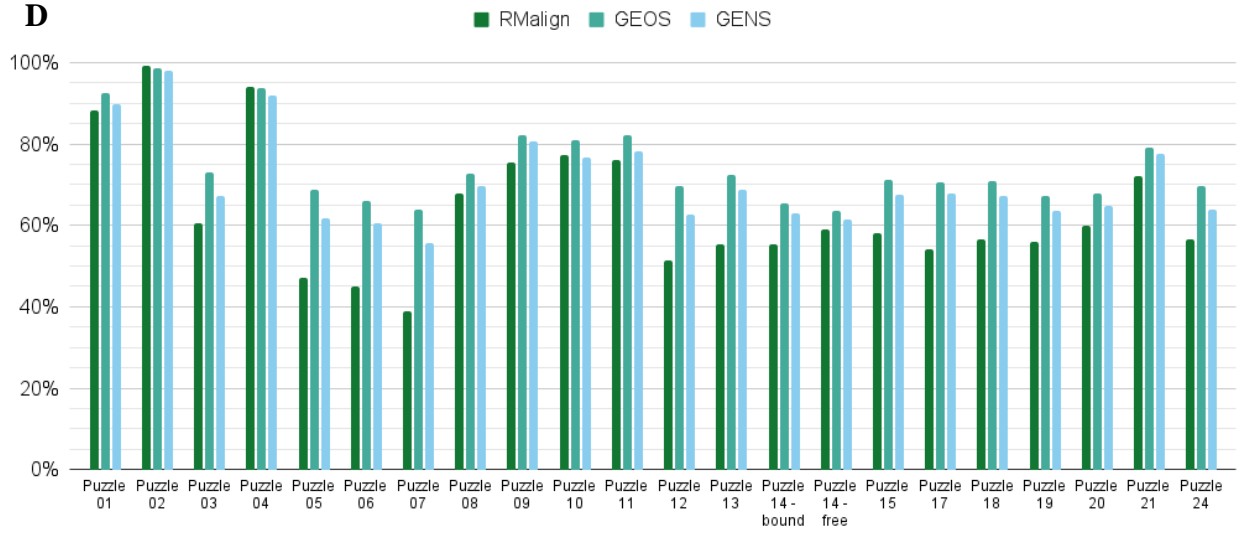**E**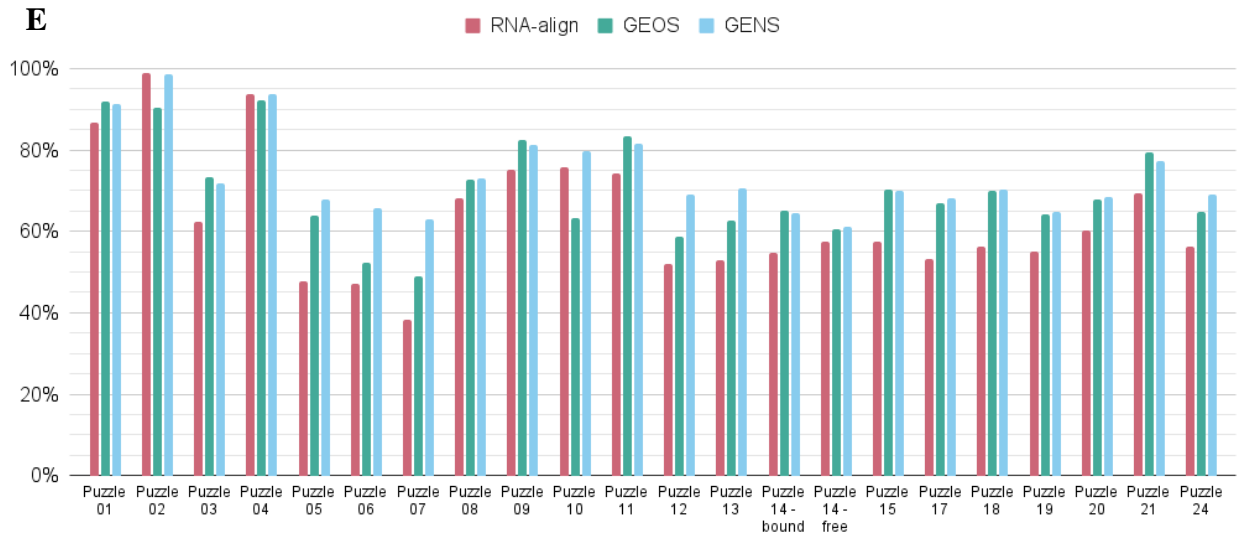

**Figure S4.** Distribution of the lengths of alignments found by GEOS in the experiment, in which the target structure of Puzzle 01, Puzzle 03, and Puzzle 04 were aligned with three models predicted in these puzzles. GENS was run with the default RMSD threshold (3.5Å) and performed 125 times for each instance.

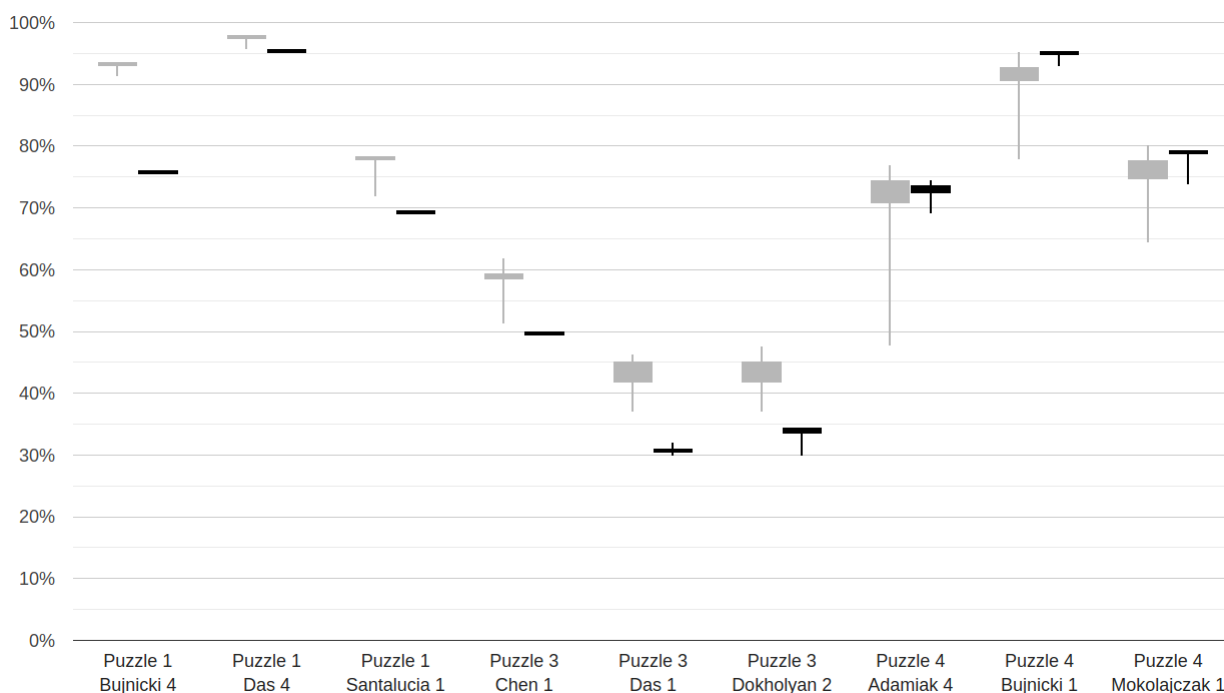

**Figure S5.** Trendline for execution time of GEOS (A) and GENS (B) computed when aligning small and medium-size structures from the RNA-Puzzles dataset.

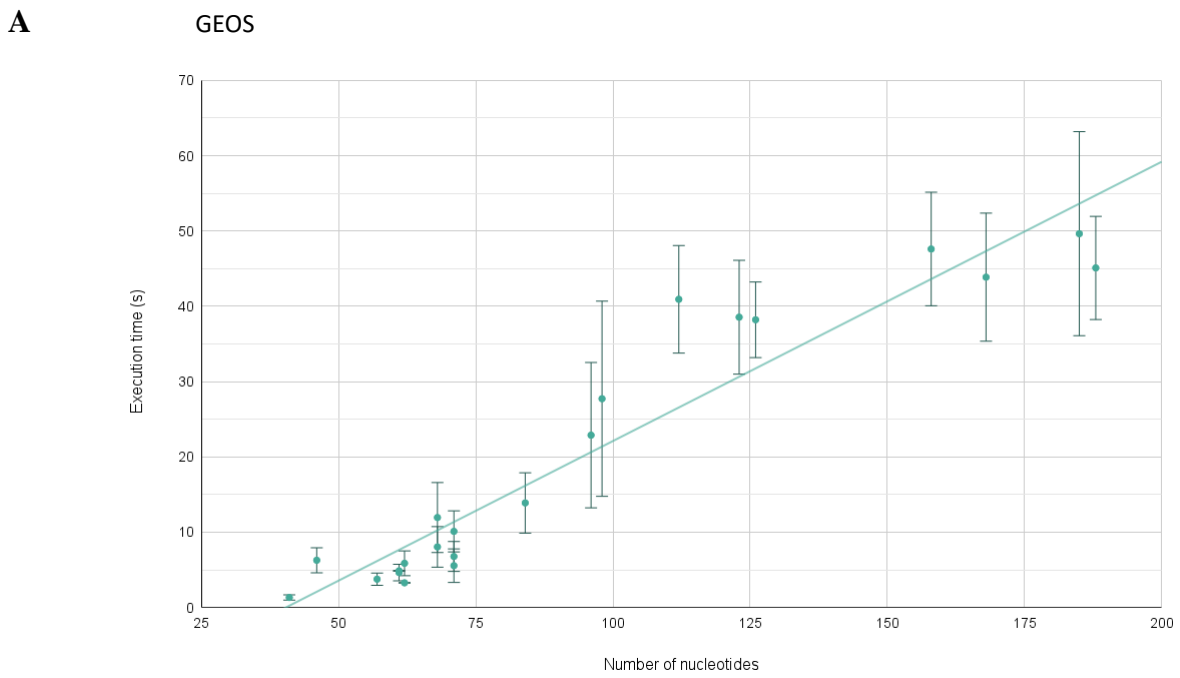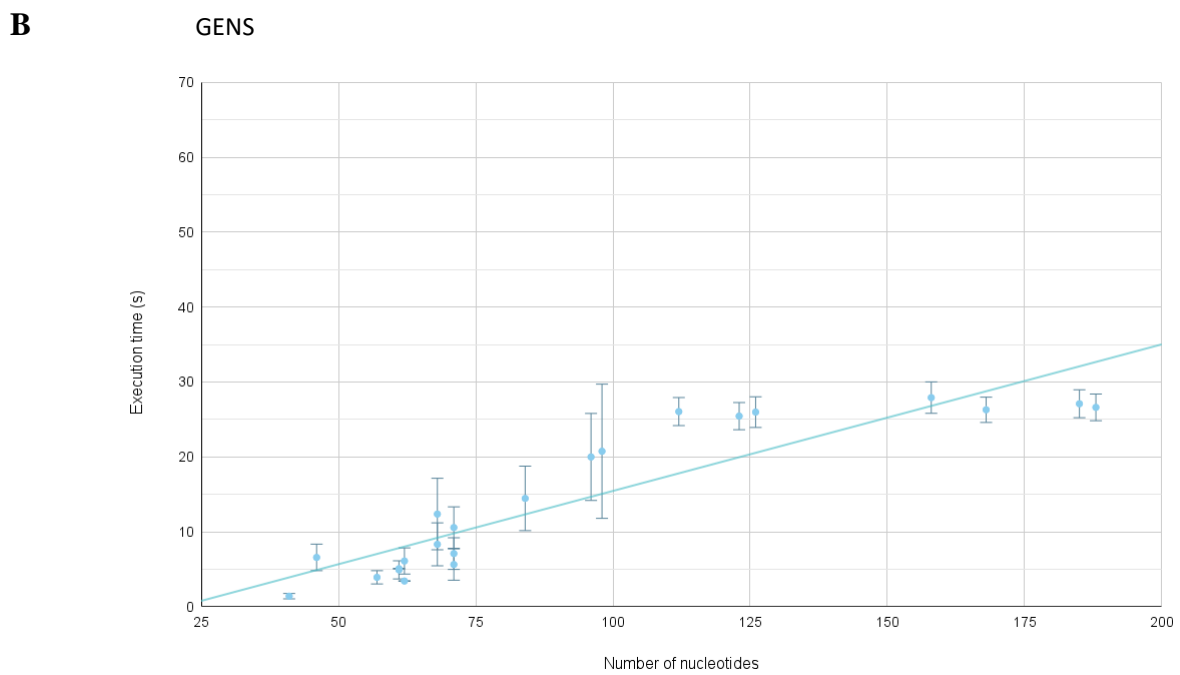

**Figure S6.** Trendline for execution time of GEOS (A) and GENS (B) computed when aligning large structures from the RNAsolo/BGSU dataset.

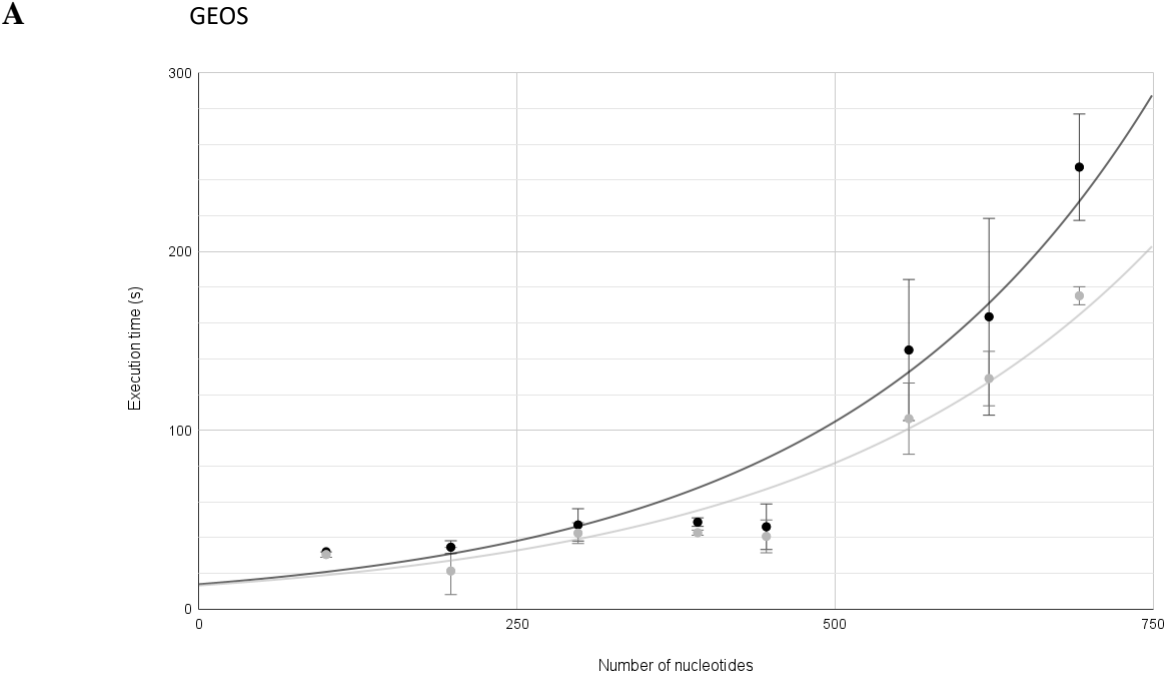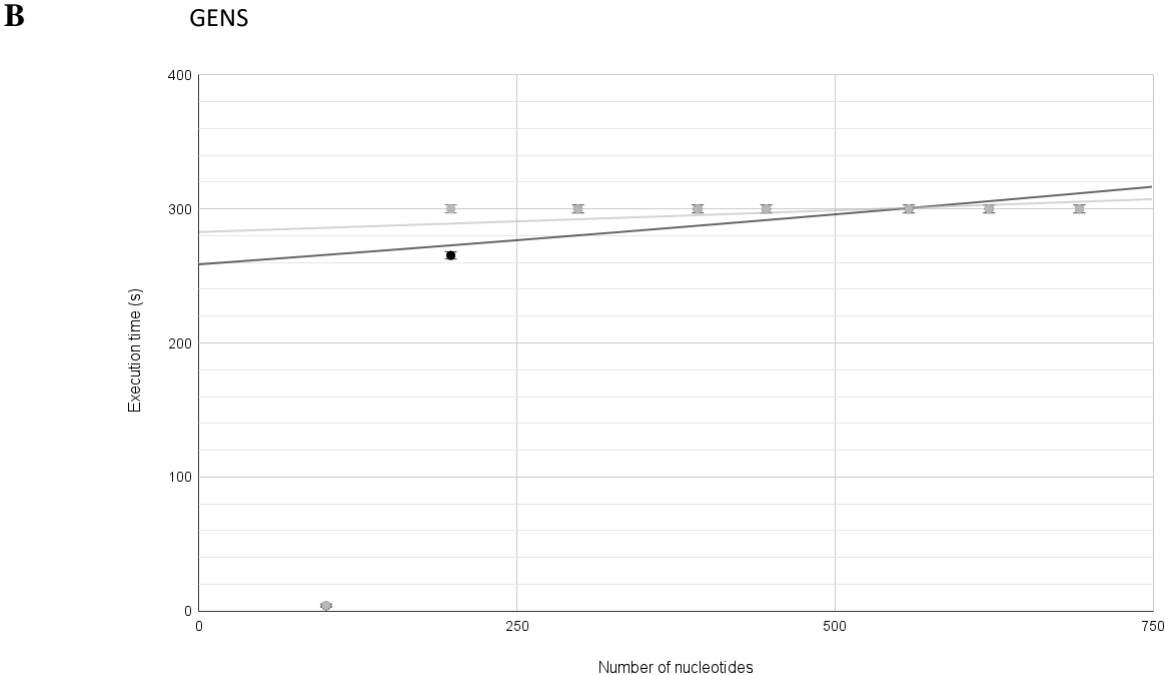



**Table S1.** The number of duels won and lost by each algorithm.

|               | GEOS | GENS | R3D Align     | # Duels won |
|---------------|------|------|---------------|-------------|
| GEOS          | –    | 580  | 1014          | 1594        |
| GENS          | 16   | –    | 1010          | 1026        |
| R3D Align     | 2    | 4    | –             | 6           |
| # Duels lost  | 18   | 584  | 2024          | –           |
|               | GEOS | GENS | STAR3D        | # Duels won |
| GEOS          | –    | 547  | 947           | 1494        |
| GENS          | 200  | –    | 915           | 1115        |
| STAR3D        | 30   | 72   | –             | 102         |
| # Duels lost  | 230  | 619  | 1862          | –           |
|               | GEOS | GENS | SuperRNAalign | # Duels won |
| GEOS          | –    | 201  | 262           | 463         |
| GENS          | 1    | –    | 260           | 261         |
| SuperRNAalign | 0    | 1    | –             | 1           |
| # Duels lost  | 1    | 202  | 522           | –           |
|               | GEOS | GENS | RMalign       | # Duels won |
| GEOS          | –    | 800  | 854           | 1654        |
| GENS          | 1    | –    | 759           | 760         |
| RMalign       | 78   | 181  | –             | 259         |
| # Duels lost  | 79   | 981  | 1613          | –           |
|               | GEOS | GENS | RNA-align     | # Duels won |
| GEOS          | –    | 551  | 872           | 1423        |
| GENS          | 262  | –    | 849           | 1111        |
| RNA-align     | 68   | 201  | –             | 269         |
| # Duels lost  | 330  | 752  | 1718          | –           |

**Table S2.** Lengths of alignments found by GEOS and GENS in three rounds of experiment. Three predicted models were aligned with the target structure of (i) Puzzle 01 (46nts), (ii) Puzzle 03 (84nts), and (iii) Puzzle 04 (126nts). Both algorithms were run with the default RMSD threshold (3.5Å) and performed 125 times for each instance.

| Round (i)                   |            | GEOS (seq-ind) | GEOS (seq-dep) | GENS (seq-ind) | GENS (seq-dep) |
|-----------------------------|------------|----------------|----------------|----------------|----------------|
| PZ1-Bujnicki-4 vs target    | Min length | 44             | 35             | 42             | 35             |
|                             | Max length | 44             | 35             | 43             | 35             |
|                             | Avg length | 44.0           | 35.0           | 42.9           | 35.0           |
|                             | St. dev.   | 0.0            | 0.0            | 0.2            | 0.0            |
| PZ1-Das-4 vs target         | Min length | 45             | 43             | 44             | 44             |
|                             | Max length | 45             | 43             | 45             | 44             |
|                             | Avg length | 45.0           | 43.0           | 44.8           | 44.0           |
|                             | St. dev.   | 0.0            | 0.0            | 0.4            | 0.0            |
| PZ1-Santalucia- 4 vs target | Min length | 36             | 32             | 33             | 32             |
|                             | Max length | 36             | 32             | 36             | 32             |
|                             | Avg length | 36.0           | 32.0           | 35.6           | 32.0           |
|                             | St. dev.   | 0.0            | 0.0            | 0.9            | 0.0            |
| Round (ii)                  |            |                |                |                |                |
| PZ3-Chen-1 vs target        | Min length | 53             | 41             | 43             | 42             |
|                             | Max length | 53             | 42             | 52             | 42             |
|                             | Avg length | 53.0           | 41.9           | 49.4           | 42.0           |
|                             | St. dev.   | 0.0            | 0.2            | 1.6            | 0.0            |
| PZ3-Das-1 vs target         | Min length | 38             | 26             | 31             | 25             |
|                             | Max length | 38             | 26             | 39             | 27             |
|                             | Avg length | 38.0           | 26.0           | 36.2           | 25.9           |
|                             | St. dev.   | 0.0            | 0.0            | 1.9            | 0.6            |
| PZ3-Dokholyan-2 vs target   | Min length | 37             | 29             | 31             | 25             |
|                             | Max length | 37             | 29             | 40             | 29             |
|                             | Avg length | 37.0           | 29.0           | 36.4           | 28.3           |
|                             | St. dev.   | 0.0            | 0.0            | 1.9            | 0.7            |
| Round (iii)                 |            |                |                |                |                |
| PZ4-Adamiak-4 vs target     | Min length | 97             | 94             | 60             | 87             |
|                             | Max length | 97             | 94             | 97             | 94             |
|                             | Avg length | 97.0           | 94.00          | 90.5           | 91.7           |
|                             | St. dev.   | 0.0            | 0.000          | 5.5            | 1.3            |
| PZ4-Bujnicki-1 vs target    | Min length | 119            | 120            | 98             | 117            |
|                             | Max length | 119            | 120            | 120            | 120            |
|                             | Avg length | 119.0          | 120.0          | 115.2          | 119.7          |
|                             | St. dev.   | 0.0            | 0.0            | 2.7            | 0.7            |
| Pz4-Mikolajczak-1 vs target | Min length | 101            | 100            | 81             | 93             |
|                             | Max length | 101            | 100            | 101            | 100            |
|                             | Avg length | 101.0          | 100.0          | 95.6           | 98.9           |
|                             | St. dev.   | 0.0            | 0.0            | 3.4            | 0.9            |

**Table S3.** Dataset used to test execution times of GEOS and GENS applied to find alignment between large RNA structures (100-700nts).

| Subset         | 1       | 2       | 3        | 4       | 5       | 6       | 7       | 8       |
|----------------|---------|---------|----------|---------|---------|---------|---------|---------|
| Representative | 6DME_A  | 5JUP_EC | 7B9V_2+6 | 7EZ2_N  | 6ZQc_D2 | 6N7R_R  | 6HIW_CA | 8H2H_A  |
| Size [nts]     | 100     | 198     | 298      | 392     | 446     | 558     | 621     | 692     |
| Class id       | 86427.1 | 99969.1 | 1315.2   | 60848.2 | 62396.2 | 34961.3 | 60828.6 | 56999.3 |
| # members      | 5       | 7       | 7        | 11      | 3       | 6       | 5       | 4       |
